# Supplementary material for: Deciphering the photophysical properties of naphthalimide derivatives using ultrafast spectroscopy
Source: Royal Society of Chemistry journal article supplement (doi:10.1039/d3cp05654f), 2024-01-01
Supplement: d3cp05654f1.pdf [file d3cp05654f1.pdf]

## Electronic Supplementary Information (ESI)

### Deciphering the photophysical properties of naphthalimide derivative using ultrafast spectroscopy

Wei Zhang,<sup>a</sup> Yalei Ma,<sup>b</sup> Hongwei Song,<sup>c</sup> Rong Miao,<sup>\*b</sup> Jie Kong,<sup>\*a</sup> Meng Zhou,<sup>\*a</sup>

<sup>a</sup>Hefei National Research Center for Physical Sciences at the Microscale, University of Science and Technology of China, Anhui 230026, China

<sup>b</sup>Laboratory of Applied Surface and Colloids Chemistry, Ministry of Education, School of Chemistry and Chemical Engineering, Shaanxi Normal University, Xi'an 710062, P. R. China

<sup>c</sup>Department of Chemistry–Angstrom Laboratory, Uppsala University, Box 523, 75120 Uppsala, Sweden

Corresponding Author

R. M. [miaorong2015@snnu.edu.cn](mailto:miaorong2015@snnu.edu.cn)

J. K. [kongjie2021@ustc.edu.cn](mailto:kongjie2021@ustc.edu.cn)

M.Z. [mzhou88@ustc.edu.cn](mailto:mzhou88@ustc.edu.cn)

## S1. Discussion on Theoretical Calculations

The optimization of  $S_1$  state when varying the twist angle was not successful with selected long-range separated functional CAM-B3LYP<sup>[1]</sup> and PCM solvent model, i.e., no significant twist was obtained in acetonitrile. On the other hand, we employed the semi-empirical evaluation with PM7<sup>[2]</sup> Hamiltonian of MOPAC<sup>[3]</sup> (with solvent model COSMO) allowed to reproduce the twisted geometries of HP-NAP in polar environment, as showed in Figure S1. The results here are similar to previous reports.<sup>[4,5]</sup>

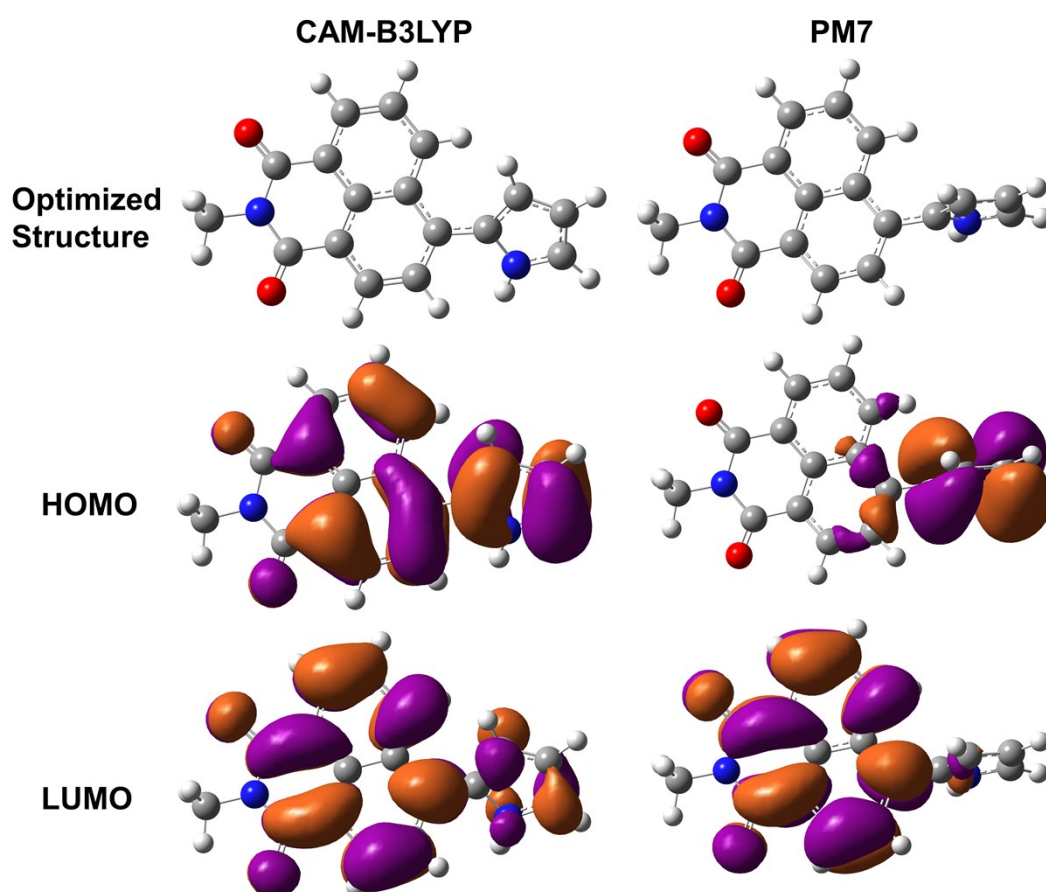

Fig. S1 The theoretical  $S_1$  results of HP-NAP at CAM-B3LYP and semi-empirical method (PM7 Hamiltonian of MOPAC, solvent model COSMO): the optimized geometries and FMOs.

## S2. Supplementary Results

Table S1. Stokes shift and solvent orientation polarizability comparison

| solvent <sup>a</sup>            | n      | $\epsilon$ | $\Delta f$ | Abs<br>/nm | Ems<br>/nm | Stokes Shift<br>/cm <sup>-1</sup> |
|---------------------------------|--------|------------|------------|------------|------------|-----------------------------------|
| Hex                             | 1.372  | 1.9        | 0          | 395        | 460        | 3577                              |
| MX1                             | 1.388  | 4.75       | 0.167      | 416        | 511        | 4469                              |
| CH <sub>2</sub> Cl <sub>2</sub> | 1.4211 | 9.1        | 0.22       | 409        | 520        | 5219                              |
| THF                             | 1.404  | 7.6        | 0.21       | 419        | 528        | 4927                              |
| MX2                             | 1.373  | 22.55      | 0.28       | 417        | 544        | 5598                              |
| ACN                             | 1.342  | 37.5       | 0.31       | 412        | 550        | 6090                              |

a. MS1 represents mixed solvent of Hex and THF (v/v=1:1); MS2 represents mixed solvent of THF and ACN (v/v=1:1). The corresponding  $\epsilon_{\text{mix}}$  and  $n_{\text{mix}}$  were calculated according to  $\epsilon_{\text{mix}} = v_a \epsilon_a + v_b \epsilon_b$  and  $n_{\text{mix}}^2 = v_a n_a^2 + v_b n_b^2$ , respectively;  $v_a$  and  $v_b$  are the volume percentages of each solvent.

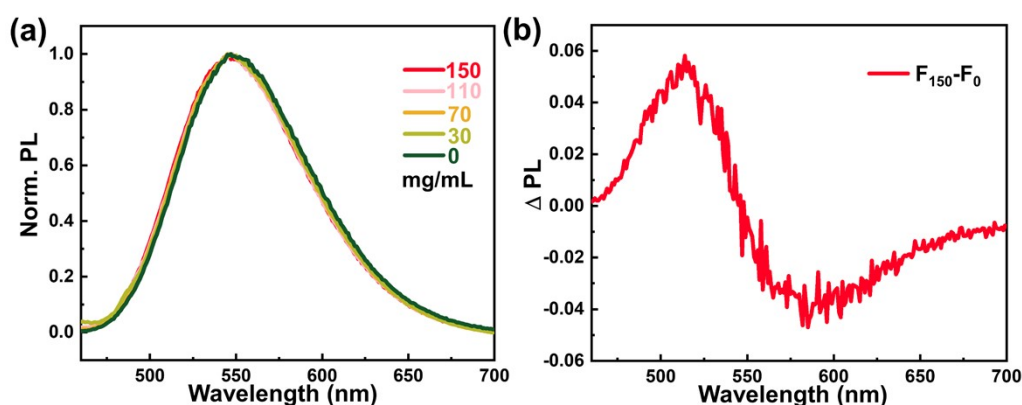

Fig. S2 (a) The normalized fluorescence spectra of HP-NAP in ACN solvent with different mass concentration of PMMA. (b) The differential spectrum between the normalized fluorescence spectra with PMMA concentration of 150 mg/mL and PMMA concentration of 0 mg/mL.

Table S2. The viscosity dependent fluorescence lifetime of HP-NAP in ACN solvent with different mass concentration

| PMMA/<br>mg·ml <sup>-1</sup> | $\tau$ /<br>ns |
|------------------------------|----------------|
| 150                          | 3.24           |
| 110                          | 3.07           |
| 70                           | 3.02           |
| 30                           | 2.79           |
| 0                            | 2.69           |

Table S3. The time constants of HP-NAP obtained from global analysis in different polar solvents.

|     | $\tau_1/\text{ps}$ | $\tau_2/\text{ns}$ |
|-----|--------------------|--------------------|
| Hex | 6.72               | 3.02               |
| THF | 1.82               | 4.50               |
| ACN | 0.64               | 2.25               |

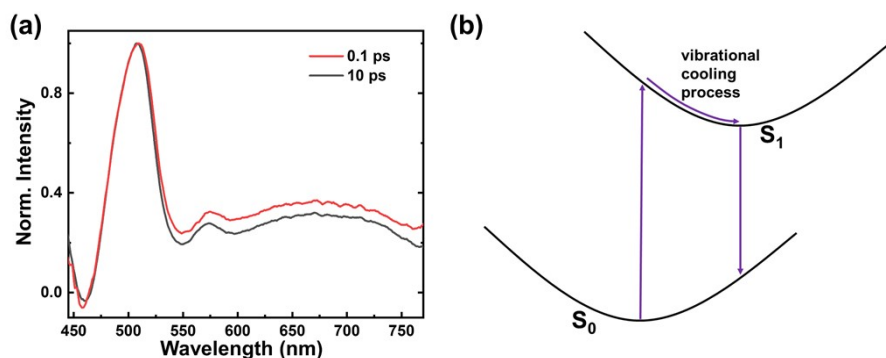

Fig. S3 (a) The normalized fs-TA spectra at different delay times of HP-NAP in Hex to demonstrate the signal change associated with the vibrational cooling. (b) The schematic diagram of vibrational cooling process of HP-NAP in Hex.

Table S4. The viscosity dependent time constants of HP-NAP obtained from global analysis in ACN solvent with different mass concentration.

| PMMA/<br>$\text{mg}\cdot\text{ml}^{-1}$ | $\tau_1$<br>/ps | $\tau_2$<br>/ns |
|-----------------------------------------|-----------------|-----------------|
| 0                                       | 0.64            | 2.25            |
| 30                                      | 0.72            | 2.56            |
| 70                                      | 0.77            | 2.78            |
| 110                                     | 0.92            | 3.04            |
| 150                                     | 0.95            | 3.13            |

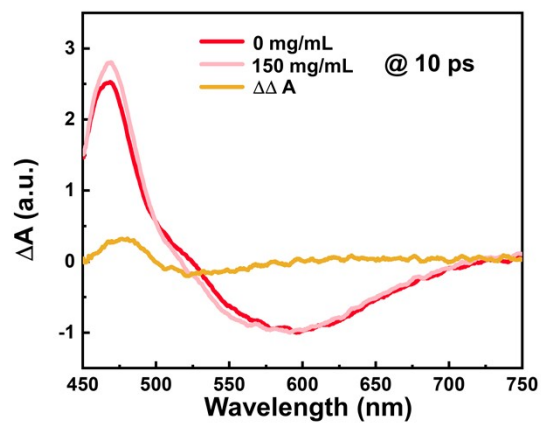

Figure S4. The TA differential spectrum ( $\Delta\Delta A$ ) between the normalized spectra with PMMA concentration of 150 mg/mL and PMMA concentration of 0 mg/mL. Noted that the TA spectra are normalized at the SE signals for showing the SE shift.

### S3. References

1. T. Yanai, D. Tew, N. Handy. Chem. Phys. Lett., **2004**, 393, 51-57.
2. J. J. P. Stewart. J. Mol. Model., **2013**, 19, 1-32.
3. J. J. P. Stewart. Stewart Computational Chemistry, Colorado Springs, CO, USA, [HTTP://OpenMOPAC.net](http://OpenMOPAC.net), **2016**.
4. J. Jovaišaitė, P. Baronas, G. Jonusauskas, D. Gudeika, A. Gruodis, J. V. Gražulevičius, S. Juršėnas. Phys. Chem. Chem. Phys., **2023**, 25, 2411-2419.
5. Z. Szakács, S. Rousseva, M. Bojtár, D. Hessz, I. Bitter, M. Kállay, M. Hilbers, H. Zhang, M. Kubinyi. Phys. Chem. Chem. Phys., **2018**, 20, 10155-10164.
